# Supplementary material for: MiR-21-5p regulates extracellular matrix degradation and angiogenesis in TMJOA by targeting Spry1
Source: Arthritis Res Ther. 2020 May 1;22:99. doi: 10.1186/s13075-020-2145-y (PMC7195789; doi:10.1186/s13075-020-2145-y)
Supplement: Supplementary file 1 — Additional file 1: Supplementary 1 Identification of knockout mice [file 13075_2020_2145_MOESM1_ESM.docx]

**Supplementary 1**

Identification of knockout mice

| primer | | 1540 | Mir21-tF2 | CTTACTTCTCTGTGTGATTTCTGTG | -94bp=451bp Wt=545bp |  | | --- | --- | --- | --- | --- | | 1541 | Mir21-tR2 | ACAACCTTTCCAAAATCCATGAGGC | | | |
| --- | --- | --- | --- | --- | --- | --- | --- | --- | --- | --- | --- |
| PCR  system | | **Reaction Components** | **Volume （μL）** | | --- | --- | | gDNA Template | 2.0 | | 10×*Taq* Buffer(mg2+ plus) | 2.0 | | dNTP Mixture（10 mM） | 0.5 | | Primer mix（10 μM） | 0.5 | | *Taq* DNA polymerase(5 U/µL) | 0.5 | | Milli-Q H2O | To 20μL | |  | |
| PCR process | | **Seg.** | **Temp.** | **Time** | **Cycle** | | --- | --- | --- | --- | | 1 | 95oC | 5min |  | | 2 | 95 oC | 30s |  | | 3 | 58oC | 30s |  | | 4 | 72 oC | 45s | 2-4,40 | | 5 | 72 oC | 3min |  | | 6 | 25 oC | hold |  |   **P1** | |  |
| Gel concentration | **1.5%** | | |
| Electrophoregram | **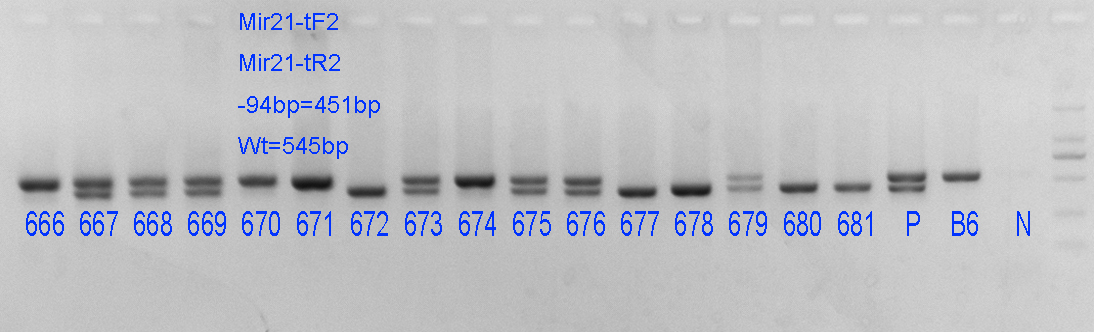** | | |
| Result judgement | **-94bp/-94bp：672，677，678，680，681**  **-94bp/wt：667, 668, 669，673，675，676，679**  **Wt/wt：666, 670, 671, 674** | | |
